# Supplementary material for: Lighting Up the Heritage Sciences: The Past and Future of Laser-Induced Fluorescence Spectroscopy in the Field of Cultural Goods
Source: MDPI journal article supplement (doi:10.3390/chemosensors11020100), 2023-02-01
Supplement: s1 [file s1]

**Table S1.** Synthesis of the types of lasers used in laser-induced fluorescence studies in the field of cultural heritage.

| No. | Subject/<br>Material                                         | Fluorescence | Producer / model             | Excitation<br>wavelength<br>[nm] | Pulse<br>duration<br>[ns] | Fluence<br>[mJ/cm <sup>2</sup> ] | Repeti-<br>tion<br>rate<br>[Hz] | Spot<br>Size<br>[mm]  | Energy/<br>pulse<br>[mJ] | Refer-<br>ence |
|-----|--------------------------------------------------------------|--------------|------------------------------|----------------------------------|---------------------------|----------------------------------|---------------------------------|-----------------------|--------------------------|----------------|
| 1.  | Oil colors                                                   | LIF          | N <sub>2</sub> laser         | 337.1                            | 5                         | -                                | 4                               | 1                     | -                        | [1]            |
| 2.  | Pigments, oil paintings                                      | LIF          | He-Cd continuous laser       | 325/442                          | -                         | -                                | -                               | -                     | -                        | [2]            |
|     |                                                              | LIF          | KrF excimer laser            | 248                              | -                         | -                                | -                               | -                     | -                        |                |
|     |                                                              | LIF          | Q-switched Nd:YAG            | 355                              | -                         | -                                | -                               | -                     | -                        |                |
| 3.  | Pigments, resins                                             | LIF          | Nd:YAG laser                 | 355                              | 0.3                       | -                                | -                               | -                     | 10                       | [3]            |
| 4.  | Oil color specimens                                          | LIF          | KrF laser                    | 248                              | 18                        | -                                | -                               | -                     | 50                       |                |
| 5.  | Stone monuments                                              | LIF / LIDAR  | Argon laser                  | 488                              | -                         | -                                | -                               | -                     | -                        | [4]            |
| 6.  | Pigments, binding media of poly-chrome materials             | LIF          | KrF laser                    | 248                              | 15                        | 3–6                              | -                               | 20<br>mm <sup>2</sup> | 0.5–1                    | [5]            |
| 7.  | Detection of green algae and cyanobacteria on stone heritage | LIF / LIDAR  | Minilite II<br>Nd: YAG laser | 355                              | -                         | -                                | -                               | -                     | -                        | [6]            |
| 8.  | Marble                                                       |              |                              |                                  |                           |                                  |                                 |                       |                          |                |
|     |                                                              | LIF          | Nd:YAG laser                 | 266 / 355                        | 7-10                      | -                                | 10                              | 8                     | 3-6                      | [7]            |

| No. | Subject/<br>Material                                                       | Fluorescence | Producer / model                                | Excitation<br>wavelength<br>[nm]                                      | Pulse<br>duration<br>[ns] | Fluence<br>[mJ/cm <sup>2</sup> ] | Repeti-<br>tion<br>rate<br>[Hz] | Spot<br>Size<br>[mm] | Energy/<br>pulse<br>[mJ] | Refer-<br>ence |
|-----|----------------------------------------------------------------------------|--------------|-------------------------------------------------|-----------------------------------------------------------------------|---------------------------|----------------------------------|---------------------------------|----------------------|--------------------------|----------------|
| 9.  | Stone surfaces                                                             | LIF/ LIDAR   | Nd:YAG laser                                    | 355                                                                   | -                         | -                                | -                               | -                    | -                        | [8]            |
| 10. | Marble, mortars                                                            | LIF / LIDAR  | Nd:YAG laser                                    | 355                                                                   | 8                         | -                                | 20                              | -                    | 30                       | [9]            |
| 11. | Wall painting materials                                                    | LIF          | Laser Photonic / LN203C N <sub>2</sub><br>laser | 337                                                                   | 1                         | -                                | 50                              | -                    | -                        | [10]           |
| 12. | Organic media in paintings (casein, egg<br>proteins, animal tissues' glue) | EES          | Jobin-Yvon Fluoromax                            | 0.2 s integration time, 0.5 nm step, excitation/emission slits 1-5 nm |                           |                                  |                                 |                      |                          | [11]           |
|     |                                                                            | LIF          | KrF excimer laser                               | 248                                                                   | 10                        | 5                                | -                               |                      |                          |                |
|     |                                                                            | LIF          | Nd:YAG laser                                    | 355                                                                   | 10                        | 5                                | -                               |                      |                          |                |
| 13. | Mineral samples                                                            | LIF          | Nd:YAG<br>Quanta-Ray                            | 266                                                                   |                           |                                  |                                 |                      | 1                        | [12]           |
|     |                                                                            |              |                                                 | 355                                                                   | -                         | -                                | 20                              | -                    | 2                        |                |
| 14. | Biodegradation on ancient painted sur-<br>faces                            | LIF / LIDAR  | Thomson DIVA Nd:YAG<br>laser                    | 355                                                                   | 10                        | -                                | 20                              | -                    | 6                        | [13]<br>[14]   |
| 15. | Stone surfaces                                                             | LIF / LIDAR  | Nd: YAG laser                                   | 355                                                                   | 5                         | -                                | 20                              | -                    | 25                       | [15]           |

| No. | Subject/<br>Material                                  | Fluorescence | Producer / model                                                                    | Excitation<br>wavelength<br>[nm]                                      | Pulse<br>dura-<br>tion<br>[ns]                     | Fluence<br>[mJ/cm <sup>2</sup> ] | Repeti-<br>tion<br>rate<br>[Hz] | Spot<br>Size<br>[mm] | Energy/<br>pulse<br>[mJ] | Refer-<br>ence |
|-----|-------------------------------------------------------|--------------|-------------------------------------------------------------------------------------|-----------------------------------------------------------------------|----------------------------------------------------|----------------------------------|---------------------------------|----------------------|--------------------------|----------------|
| 16. | Fresco analysis                                       | LIF / LIDAR  | Thomson DIVA Nd:YAG<br>laser                                                        | 266<br>355                                                            | -                                                  | -                                | -                               | -                    | 5                        | [16]           |
| 17. | Binding media (based on milk, egg, an-<br>imal glues) | LIF          | KrF excimer laser                                                                   | 248                                                                   | 10                                                 | 5                                | -                               | 1 x 1                | -                        | [17]           |
|     |                                                       | LIF          | Nd:YAG laser                                                                        | 355                                                                   |                                                    |                                  |                                 |                      | -                        |                |
|     |                                                       | EES          | Jobin-Yvon Fluoromax/<br>Xe arc lamp                                                | 0.2 s integration time, 0.5 nm step, excitation/emission slits 1-5 nm |                                                    |                                  |                                 |                      |                          |                |
| 18. | Historical documents                                  | LIF          | Quantel /<br>Nd:YAG laser                                                           | 266                                                                   | 6                                                  | 50                               | 20                              | -                    | -                        | [18]           |
| 19. | Proteinaceous binders used in paint-<br>ings          | EES          | Jobin-Yvon/Horiba Fluoro-<br>max-P /<br>Xe arc lamp                                 | 220-450                                                               | Emission recorded between 250-800 nm, 1 nm<br>step |                                  |                                 |                      |                          |                |
|     |                                                       | LIF          | AG BraggStar<br>200, TUI Laser,<br>KrF excimer laser                                | 248                                                                   | 15                                                 | 5                                | -                               | 1 x 1                | -                        | [19]           |
|     |                                                       | LIF          | LN203C, Laser Photonics,<br>N <sub>2</sub> laser                                    | 337                                                                   | 1                                                  | 0.2                              | -                               | 5 x 5                | -                        |                |
|     |                                                       | LIF          | Spectron Laser Systems /<br>Nd:YAG laser                                            | 355                                                                   | 10                                                 | 5                                | -                               | -                    | -                        |                |
|     |                                                       | LIF          | DPS-4,4''-<br>(1,2-ethenediyl)bis(1,1'-bi-<br>phenyl); Exciton<br>compact dye laser | 405                                                                   | -                                                  | 0.04                             | -                               | 5 x 5                | -                        |                |
|     |                                                       | 20.          | Fungal strains                                                                      | LIF / LIDAR                                                           | FLIDAR-3<br>XeCl laser                             | 308                              | 10                              | -                    | 1-10                     | -              |

| No. | Subject/<br>Material                          | Fluorescence | Producer / model                                                         | Excitation<br>wavelength<br>[nm] | Pulse<br>duration<br>[ns] | Fluence<br>[mJ/cm <sup>2</sup> ] | Repeti-<br>tion<br>rate<br>[Hz] | Spot<br>Size<br>[mm] | Energy/<br>pulse<br>[mJ] | Refer-<br>ence |
|-----|-----------------------------------------------|--------------|--------------------------------------------------------------------------|----------------------------------|---------------------------|----------------------------------|---------------------------------|----------------------|--------------------------|----------------|
| 21. | Egg yolk and white                            | EES          | Jobin-Yvon/Horiba Fluoro-max-P                                           | 290                              | -                         | -                                | -                               | -                    | -                        | [21]           |
|     |                                               |              |                                                                          | 350                              | -                         | -                                | -                               | -                    | -                        |                |
| 22. | Protein-based binding media, pigments         | EES          | Jobin-Yvon/Horiba Fluoro-max-P /<br>Xe arc lamp                          | 220-450,<br>5 nm step            | -                         | -                                | -                               | -                    | -                        | [22]           |
| 23. | Lake pigments                                 | EES          | Jovin-Yvon Spex Fluorog 3-2.2                                            | 490                              | -                         | -                                | -                               | -                    | -                        | [23]           |
| 24. | Monitoring laser cleaning of modern paintings | LIF          | LAMBDA Physik<br>Compex 110/<br>KrF excimer laser                        | 248                              | 20                        | 5                                | -                               | -                    | -                        | [24]           |
| 25. | Ultramarine pigments                          | LIF          | Quantel /<br>CFR-200 graded reflectivity<br>mirror (GRM)<br>Nd:YAG laser | 266                              | 8                         | 1500                             | 20                              | 6                    | 50                       | [25]           |
| 26. | Monuments                                     | LIF          | Nd:YAG laser                                                             | 355                              | -                         | -                                | -                               | -                    | -                        | [26]           |
|     |                                               | LIDAR        | XeCl excimer laser                                                       | 308                              | -                         | -                                | -                               | -                    | -                        |                |
| 27. | Aged marble, Paraloid B72                     | LIF          | Thompson DIVA / Nd:YAG<br>laser                                          | 266                              | 8                         | 0.87                             | 20                              | -                    | -                        | [27]           |

| No. | Subject/<br>Material            | Fluorescence | Producer / model                                    | Excitation<br>wavelength<br>[nm]                                                | Pulse<br>duration<br>[ns]                                                   | Fluence<br>[mJ/cm <sup>2</sup> ] | Repeti-<br>tion<br>rate<br>[Hz] | Spot<br>Size<br>[mm] | Energy/<br>pulse<br>[mJ] | Refer-<br>ence |
|-----|---------------------------------|--------------|-----------------------------------------------------|---------------------------------------------------------------------------------|-----------------------------------------------------------------------------|----------------------------------|---------------------------------|----------------------|--------------------------|----------------|
| 28. | Photoautotrophic biodeteriogens | LF LIDAR     | CNR-IFAC /<br>XeCl excimer laser                    | 308                                                                             | 10                                                                          | -                                | 2                               | -                    | 30                       | [28]           |
|     |                                 |              | Coumarin 102 LC4800 dye<br>laser                    | 480                                                                             | -                                                                           | -                                | -                               | -                    | -                        |                |
|     |                                 |              | Spectra Physics, GCR-290 /<br>Nd:YAG laser          | 355                                                                             | 4-5                                                                         | -                                | 20                              | -                    | 30                       |                |
| 29. | Triterpenoid paint varnishes    | EES          | Jobin-Yvon / Fluorolog<br>Xe arc lamp               | 250-500                                                                         | $\lambda_{em}=300-600$ nm                                                   |                                  |                                 |                      |                          | [29]           |
| 30. | Polymeric materials             | EES          | Jobin-Yvon/Horiba /<br>Fluorolog<br>Xe arc lamp     | 300-500                                                                         | Fibers placed at 45°, 5 nm resolution, $\Delta\lambda=15-225$ nm, 5 nm step |                                  |                                 |                      |                          | [30]           |
| 31. | Pigments identification         | EES          | Jobin-Yvon/Horiba /<br>Fluorolog 2-1<br>Xe arc lamp | 300-420                                                                         | Front face (23°) detection, $\lambda_{em}=350-600$ nm                       |                                  |                                 |                      |                          | [31]           |
|     |                                 | TR-LIF       | FTSS 355-50, Crylas GmbH/<br>Nd:YAG laser           | 355                                                                             | -                                                                           | 0.00014                          | -                               | -                    | -                        |                |
| 32. | Marble                          | LIF          | ENEA /<br>Nd:YAG laser                              | 266<br>355                                                                      | 8                                                                           | 0.9                              | 20                              | -                    | -                        | [32]           |
| 33. | Tempera paints                  | EES / SFS    | Jobin-Yvon<br>Fluoromax,<br>Xe lamp                 | 0.2 s integration time, 1 nm step, excitation/emission 2.5 nm slits, 30° angle. |                                                                             |                                  |                                 |                      |                          | [33]           |
| 34. | Stone patina                    | LIF          | Quantel, Brilliant B /<br>Nd:YAG laser              | 266                                                                             | 5                                                                           | -                                | 10                              | 1                    | 0.1                      | [34]           |
| 35. | Restoration materials           | LIF          | ENEA /<br>Nd:YAG laser                              | 266<br>355                                                                      | -                                                                           | -                                | -                               | -                    | -                        | [35]           |
| 36. | Mural paintings                 | LIF          | Continuum, Minilite II/<br>Nd:YAG laser             | 355                                                                             | 5                                                                           | 0.1-1                            | 10                              | 3                    | 8                        | [36]           |

| No. | Subject/<br>Material                                          | Fluorescence         | Producer / model                      | Excitation<br>wavelength<br>[nm] | Pulse<br>duration<br>[ns] | Fluence<br>[mJ/cm <sup>2</sup> ] | Repeti-<br>tion<br>rate<br>[Hz] | Spot<br>Size<br>[mm] | Energy/<br>pulse<br>[mJ] | Refer-<br>ence |
|-----|---------------------------------------------------------------|----------------------|---------------------------------------|----------------------------------|---------------------------|----------------------------------|---------------------------------|----------------------|--------------------------|----------------|
| 37. | Scanning lidar fluorosensor for remote diagnostic of surfaces | LIF scanning / LIDAR | Thomson DIVA / Nd:YAG laser           | 266<br>355                       | 10                        | -                                | 20                              | -                    | 1.5                      | [37]           |
| 38. | Pigments                                                      | EES                  | Jobin–Yvon (FluoroMax-4)              | 300                              | -                         | -                                | -                               | -                    | -                        | [38]           |
| 39. | Paintings                                                     | EES                  | Jasco Fluorescence Spectrophotometer  | 250–480                          | -                         | -                                | -                               | -                    | -                        | [39]           |
| 40. | Pigments, binders, acrylic resins, frescoes                   | Hyperspectral LIF    | Nd:YAG laser                          | 266<br>355                       | 10                        | 1                                | 20                              | -                    | -                        | [40]           |
| 41. | Frescoes, pigments                                            | LIF                  | Continuum, Minilite II / Nd:YAG laser | 355                              | 5                         | 0.1 - 1                          | 10                              | 3                    | 8                        | [36]           |
| 42. | Pigments analysis                                             | LIF                  | Crylas / Nd:YAG                       | 266                              | -                         | -                                | -                               | -                    | -                        | [41]           |
|     |                                                               |                      | Quanta Ray GCR3 / Nd:YAG              | 355                              | 8                         | -                                | 10                              | -                    | <35                      |                |
|     |                                                               |                      | Semiconductor lasers                  | 405<br>445<br>532                | -                         | -                                | -                               | -                    | -                        |                |
| 43. | Medieval miniatures                                           | EES                  | Jobin Yvon Fluorolog SPEX 212         | 366                              | -                         | -                                | -                               | -                    | -                        | [42]           |
| 44. | Cultural goods                                                | LIF                  | FTSS 355-50 Crylas / Nd:YAG laser     | 355                              | 1                         | < 140 nJ/cm <sup>-2</sup>        | -                               | -                    | 0.07                     | [43]           |
| 45. | Organic pigments, contemporary art                            | EES                  | Jobin-Yvon CP240                      | -                                | -                         | -                                | -                               | -                    | -                        | [44]           |
| 46. | Frescoes, pigments                                            | LIF                  | Continuum, Minilite II / Nd:YAG laser | 355                              | 5                         | 0.1–1                            | 10                              | 4                    | 8                        | [45]           |
| 47. | Frescoes                                                      | LIF                  | ENEA / Nd:YAG laser                   | 266                              | -                         | 0.01–0.02                        | -                               | -                    | 1.5                      | [46]           |
| 48. | Modern synthetic materials and pigments                       | LIF scanning         | ENEA / Nd:YAG laser                   | 266                              |                           |                                  |                                 |                      |                          | [47]           |

| No. | Subject/<br>Material        | Fluorescence           | Producer / model                                    | Excitation<br>wavelength<br>[nm] | Pulse<br>duration<br>[ns] | Fluence<br>[mJ/cm <sup>2</sup> ] | Repeti-<br>tion<br>rate<br>[Hz] | Spot<br>Size<br>[mm] | Energy/<br>pulse<br>[mJ] | Refer-<br>ence |
|-----|-----------------------------|------------------------|-----------------------------------------------------|----------------------------------|---------------------------|----------------------------------|---------------------------------|----------------------|--------------------------|----------------|
| 49. | Works of art                | LIF                    | LED                                                 | 285<br>375                       | -                         | -                                | -                               | -                    | -                        | [48]           |
| 50. | Plastics identification     | LIF scanning           | ENEA EX5GAM / KrF ex-<br>cimer laser                | 248                              | -                         | -                                | 500                             | 6 x 3                | 16                       | [49]           |
| 51. | Contemporary artworks       | LIF                    | Opolette by Opotek tunable<br>laser                 | 220                              | 3                         | 2000                             | 20                              | 0.3x1                | 0.003                    | [50]           |
| 52. | Binders                     | LIF                    | Opolette by Opotek tunable<br>laser                 | 220                              | 3                         | 1                                | 20                              | 0.3x1                | 0.003                    | [51]           |
| 53. | Dammar varnish              | LIF                    | KrF excimer laser                                   | 248                              | -                         | 1                                | -                               | -                    | -                        | [52]           |
| 54. | White pigments mixtures     | EES                    | Horiba FluoroMax-2                                  | 365                              | -                         | -                                | -                               | -                    | -                        | [53]           |
| 55. | Frescoes, pigments          | Hyperspec-<br>tral LIF | Nd:YAG laser                                        | 266                              | 10                        | -                                | 20                              | 1.5                  | -                        | [54]           |
| 56. | Rocks, mural paintings      | LIF                    | LS-2147, Lotis II /<br>Nd:YAG laser                 | 266<br>355<br>532                | 17                        | 20                               | 10                              | 2                    | -                        | [55]           |
| 57. | Cultural heritage materials | LIF                    | Quantel CFR/ Nd:YAG la-<br>ser                      | 266<br>532                       | 8                         | -                                | -                               | -                    | 0-50                     | [56]           |
| 58. | Stone surfaces              | LIF                    | IFAC-CNR                                            | 405                              | -                         | -                                | -                               | -                    | -                        | [57]           |
| 59. | Optimizing laser cleaning   | LIF                    | LAMBDA PHYSIK/ L.P.X.<br>205SD<br>KrF excimer laser | 248                              | 24                        | 5                                | -                               | 1 mm <sup>2</sup>    | -                        | [58]           |
| 60. | Biodegradation of buildings | LIF scanning           | ENEA / Thomsom DIVA<br>Nd:YAG laser                 | 266                              | 8                         | 0.9                              | 20                              | -                    | -                        | [59]           |

| No. | Subject/<br>Material                                                     | Fluorescence           | Producer / model                               | Excitation<br>wavelength<br>[nm] | Pulse<br>duration<br>[ns] | Fluence<br>[mJ/cm <sup>2</sup> ] | Repeti-<br>tion<br>rate<br>[Hz] | Spot<br>Size<br>[mm] | Energy/<br>pulse<br>[mJ] | Refer-<br>ence |
|-----|--------------------------------------------------------------------------|------------------------|------------------------------------------------|----------------------------------|---------------------------|----------------------------------|---------------------------------|----------------------|--------------------------|----------------|
| 61. | Essential oil efficiency on biodeterio-<br>gens                          | LIF scanning           | ENEA / Nd:YAG laser                            | 266                              | -                         | -                                | -                               | -                    | -                        | [60]           |
| 62. | Painting materials                                                       | TG-LIF                 | ENEA /<br>Nd:YAG laser                         | 266                              | 8                         | -                                | 20                              | -                    | 1.5                      | [61]           |
| 63. | Phthalocyanine paints                                                    | LIF                    | Nd:YAG laser                                   | 266                              | 15                        | -                                | 1                               | -                    | 0.5                      | [62]           |
| 64. | Painted murals                                                           | LIF LIDAR              | ENEA LidArt /<br>Nd:YAG laser                  | 266                              | -                         | < 0.01                           | -                               | -                    | -                        | [63]           |
| 65. | Historical wooden artwork                                                | LIF                    | modified DIVA, Thales SAS<br>/<br>Nd-YAG laser | 266                              | 8                         | < 0.002                          | 20                              | -                    | 0.9                      | [64]           |
| 66. | Pigments                                                                 | Hyperspec-<br>tral LIF | Nd:YAG laser                                   | 266                              | -                         | <10000                           | -                               | -                    | -                        | [65]           |
| 67. | Glass grisailles                                                         | LIF                    | Nd:YAG laser                                   | 266                              | 6                         | 6                                | 10                              | 1x2                  | -                        | [66]           |
| 68. | Hyperspectral and a multispectral scan-<br>ning systems intercalibration | LIF                    | diode-pumped solid-state<br>laser              | 266                              | -                         | -                                | -                               | -                    | -                        | [67]           |
|     |                                                                          |                        | KrF excimer laser                              | 248                              | -                         | -                                | < 500                           | -                    | -                        |                |
| 69. | Stained glass windows                                                    | LIF                    | Nd:YAG laser                                   | 266                              | 15                        | -                                | -                               | 1-2                  | 6                        | [68]           |

## References

- [1] T. Miyoshi, "Fluorescence from resins for oil painting under N2 laser excitation," *Jpn. J. Appl. Phys.*, 1990, doi: 10.1143/JJAP.29.1727.
- [2] D. Anglos *et al.*, "Artwork diagnostics laser induced breakdown spectroscopy (LIBS) and laser induced fluorescence (LIF) spectroscopy," in *LACONA I: lasers in the conservation of art-works: 4-6 October 1995, Heraklion, Crete, Greece: workshop*, 1997.
- [3] I. Borgia, R. Fantoni, C. Flamini, T. M. Di Palma, A. G. Guidoni, and A. Mele, "Luminescence from pigments and resins for oil paintings induced by laser excitation," *Appl. Surf. Sci.*,



- 1998, doi: 10.1016/S0169-4332(97)00616-8.
- [4] G. Cecchi *et al.*, "Fluorescence lidar technique for the remote sensing of stone monuments," *J. Cult. Herit.*, 2000, doi: 10.1016/S1296-2074(99)00120-X.
  - [5] M. Castillejo *et al.*, "Spectroscopic analysis of pigments and binding media of polychromes by the combination of optical laser-based and vibrational techniques," *Appl. Spectrosc.*, 2001, doi: 10.1366/0003702011953135.
  - [6] D. Lognoli, G. Lamenti, L. Pantani, D. Tirelli, P. Tiano, and L. Tomaselli, "Detection and characterization of biodeteriogens on stone cultural heritage by fluorescence lidar," *Appl. Opt.*, 2002, doi: 10.1364/ao.41.001780.
  - [7] F. Colao, L. Fiorani, R. Fantoni, A. Palucci, and J. Striber, "Diagnostics of stone samples by laser induced fluorescence," 2003.
  - [8] D. Lognoli *et al.*, "Fluorescence lidar imaging of the cathedral and baptistery of Parma," *Appl. Phys. B Lasers Opt.*, 2002, doi: 10.1007/s00340-003-1126-6.
  - [9] L. Pantani *et al.*, "Lithotypes characterization with a fluorescence lidar imaging system using a multi-wavelength excitation source," 2003, doi: 10.1117/12.463409.
  - [10] D. Comelli, C. D'Andrea, G. Valentini, R. Cubeddu, C. Colombo, and L. Toniolo, "Fluorescence lifetime imaging and spectroscopy as tools for nondestructive analysis of works of art," *Appl. Opt.*, 2004, doi: 10.1364/AO.43.002175.
  - [11] A. Nevin, S. Cather, D. Anglos, and C. Fotakis, "Laser-induced fluorescence analysis of protein-binding media, in the conservation of artworks," in *Lasers in the Conservation of Artworks LACONA VI Proceedings*, 2005, pp. 399–406.
  - [12] B. J. Bozlee, A. K. Misra, S. K. Sharma, and M. Ingram, "Remote Raman and fluorescence studies of mineral samples," 2005, doi: 10.1016/j.saa.2005.02.033.
  - [13] P. Aristipini, F. Colao, R. Fantoni, L. Fiorani, and A. Palucci, "<title>Compact scanning lidar fluorosensor for cultural heritage diagnostics</title>," 2005, doi: 10.1117/12.633546.
  - [14] F. Colao, R. Fantoni, L. Fiorani, A. Palucci, and I. Gomoiu, "Compact scanning lidar fluorosensor for investigations of biodegradation on ancient painted surfaces," *J. Optoelectron. Adv. Mater.*, 2005.
  - [15] R. Grönlund, J. Hällström, A. Johansson, K. Barup, and S. Svanberg, "Remote multicolor excitation laser-induced fluorescence imaging," *Laser Chem.*, 2006, doi: 10.1155/2006/57934.
  - [16] F. Colao, R. Fantoni, L. Fiorani, and A. Palucci, "Application of a scanning hyperspectral lidar fluorosensor to fresco diagnostics during the CULTURE 2000 campaign in Bucovina," *Rev. Monum. Istor.*, vol. 1–2, no. LXXV, 2006.
  - [17] A. Nevin, S. Cather, D. Anglos, and C. Fotakis, "Analysis of protein-based binding media found in paintings using laser induced fluorescence spectroscopy," *Anal. Chim. Acta*, 2006, doi: 10.1016/j.aca.2006.01.027.
  - [18] K. Komar and G. Sliwinski, "Non-Destructive Observation of the Laser Treatment Effect on Historical Paper via the Laser-Induced Fluorescence Spectra," in *Lasers in the Conservation of Artworks*, 2007.
  - [19] A. Nevin *et al.*, "Time-resolved fluorescence spectroscopy and imaging of proteinaceous binders used in paintings," *Anal. Bioanal. Chem.*, 2007, doi: 10.1007/s00216-007-1402-0.
  - [20] V. Raimondi, L. Palombi, G. Cecchi, D. Lognoli, M. Trambusti, and I. Gomoiu, "Remote detection of laser-induced autofluorescence on pure cultures of fungal and bacterial strains and their analysis with multivariate techniques," *Opt. Commun.*, 2007, doi: 10.1016/j.optcom.2006.12.013.
  - [21] I. Osticioli *et al.*, "Micro-Raman and fluorescence spectroscopy for the assessment of the effects of the exposure to light on films of egg white and egg yolk," *J. Raman Spectrosc.*, 2008, doi: 10.1002/jrs.1915.
  - [22] A. Nevin, D. Anglos, S. Cather, and A. Burnstock, "The influence of visible light and inorganic pigments on fluorescence excitation emission spectra of egg-, casein- and collagen-based painting media," *Appl. Phys. A Mater. Sci. Process.*, 2008, doi: 10.1007/s00339-008-4460-z.
  - [23] A. Claro *et al.*, "The use of microspectrofluorimetry for the characterization of lake pigments," *Talanta*, 2008, doi: 10.1016/j.talanta.2007.07.036.
  - [24] A. Selimis *et al.*, "In-depth assessment of modifications induced during the laser cleaning of modern paintings," 2009, doi: 10.1117/12.827658.
  - [25] I. Osticioli *et al.*, "A new compact instrument for Raman, laser-induced breakdown, and laser-induced fluorescence spectroscopy of works of art and their constituent materials," *Rev. Sci. Instrum.*, 2009, doi: 10.1063/1.3184102.
  - [26] J. Hällström *et al.*, "Documentation of soiled and biodeteriorated facades: A case study on the Coliseum, Rome, using hyperspectral imaging fluorescence lidars," *J. Cult. Herit.*, 2009, doi:

- 10.1016/j.culher.2008.04.008.
- [27] F. Persia, L. Caneve, P. Conti, C. Bosco, and F. Grimaldi, "Study of aging effects on treated marbles by colorimetry and laser induced fluorescence," 2009, [Online]. Available: [https://books.google.ro/books?id=uuRLHs472RsC&pg=PA329&lpg=PA329&dq=Study+of+aging+effects+on+treated+marbles+by+colorimetry+and+laser+induced+fluorescence&source=bl&ots=wFvK7CKj8&sig=ACfU3U29vZmZNdmO\\_-3ScEpRmKSSCYpew&hl=ro&sa=X&ved=2ahUKEwjfv5-S4uP4AhW](https://books.google.ro/books?id=uuRLHs472RsC&pg=PA329&lpg=PA329&dq=Study+of+aging+effects+on+treated+marbles+by+colorimetry+and+laser+induced+fluorescence&source=bl&ots=wFvK7CKj8&sig=ACfU3U29vZmZNdmO_-3ScEpRmKSSCYpew&hl=ro&sa=X&ved=2ahUKEwjfv5-S4uP4AhW).
- [28] V. Raimondi *et al.*, "The fluorescence lidar technique for the remote sensing of photoautotrophic biodeteriogens in the outdoor cultural heritage: A decade of in situ experiments," *Int. Biodeterior. Biodegrad.*, 2009, doi: 10.1016/j.ibiod.2009.03.006.
- [29] A. Nevin, D. Comelli, I. Osticioli, L. Toniolo, G. Valentini, and R. Cubeddu, "Assessment of the ageing of triterpenoid paint varnishes using fluorescence, Raman and FTIR spectroscopy," *Anal. Bioanal. Chem.*, 2009, doi: 10.1007/s00216-009-3005-4.
- [30] F. Toja, A. Nevin, D. Comelli, M. Levi, R. Cubeddu, and L. Toniolo, "Fluorescence and Fourier-transform infrared spectroscopy for the analysis of iconic Italian design lamps made of polymeric materials," *Anal. Bioanal. Chem.*, 2011, doi: 10.1007/s00216-010-4323-2.
- [31] D. Comelli *et al.*, "On the discovery of an unusual luminescent pigment in Van Gogh's painting 'les bretonnes et le pardon de pont Aven,'" *Appl. Phys. A Mater. Sci. Process.*, 2012, doi: 10.1007/s00339-011-6665-9.
- [32] C. Giancrisofaro, R. D'Amato, L. Caneve, L. Pilloni, A. Rinaldi, and F. Persia, "PERFORMANCE OF NANOCOMPOSITES FOR CONSERVATION OF ARTISTIC STONES," *AIP Conf. Proc.*, vol. 1603, no. 86, 2014, doi: <http://dx.doi.org/10.1063/1.4883046>.
- [33] S. Carlesi, "OPTICAL SPECTROSCOPIES: APPLICATION TO THE STUDY OF PAINT MODELS," Università degli Studi Firenze, 2012.
- [34] M. Oujja, C. Vázquez-Calvo, M. Sanz, M. Á. De Buergo, R. Fort, and M. Castillejo, "Laser-induced fluorescence and FT-Raman spectroscopy for characterizing patinas on stone substrates," *Anal. Bioanal. Chem.*, 2012, doi: 10.1007/s00216-011-5319-2.
- [35] F. Colao, R. Fantoni, L. Caneve, L. Fiorani, R. Dell'Erba, and V. Fassina, "Diagnostica superficiale non invasiva mediante fluorescenza indotta da laser (LIF) sulle pitture murali di Giusto de' Menabuoi nel Battistero di Padova," in *Atti del Convegno da "Guariento a Giusto de' Menabuoi: studi, ricerche e restauri*, 2012, pp. 85–99.
- [36] V. Raimondi *et al.*, "Study of the effects of low-fluence laser irradiation on wall paintings: Test measurements on fresco model samples," *Appl. Surf. Sci.*, 2013, doi: 10.1016/j.ap-susc.2013.07.077.
- [37] L. Caneve, F. Colao, R. Fantoni, and L. Fiorani, "Scanning lidar fluorosensor for remote diagnostic of surfaces," *Nucl. Instruments Methods Phys. Res. Sect. A Accel. Spectrometers, Detect. Assoc. Equip.*, 2013, doi: 10.1016/j.nima.2012.12.009.
- [38] M. Oujja *et al.*, "Wavelength and pulse duration effects on laser induced changes on raw pigments used in paintings," *Spectrochim. Acta - Part A Mol. Biomol. Spectrosc.*, 2013, doi: 10.1016/j.saa.2012.10.001.
- [39] M. R. Mannino, S. Orecchio, and G. Gennaro, "Microanalytical method for studying paintings by use of fluorescence spectroscopy combined with principal component analysis," *Microchem. J.*, 2013, doi: 10.1016/j.microc.2013.05.014.
- [40] R. Fantoni *et al.*, "Laser-induced fluorescence study of medieval frescoes by Giusto de' Menabuoi," *J. Cult. Herit.*, 2013, doi: 10.1016/j.culher.2012.10.025.
- [41] V. Atanassova, S. Karatodorov, G. Yankov, P. Zahariev, and E. Tsvekova, "Laser-Induced Fluorescence Spectroscopy – a Contemporary Approach to Cultural Heritage," *Adv. Bulg. Sci.*, pp. 5–10, 2013.
- [42] A. Mounier *et al.*, "Hyperspectral imaging, spectrofluorimetry, FORS and XRF for the non-invasive study of medieval miniatures materials," *Herit. Sci.*, 2014, doi: 10.1186/s40494-014-0024-z.
- [43] A. Nevin *et al.*, "Time-resolved photoluminescence spectroscopy and imaging: New approaches to the analysis of cultural heritage and its degradation," *Sensors (Switzerland)*, 2014, doi: 10.3390/s140406338.
- [44] M. Romani, F. Colao, R. Fantoni, M. Guiso, and M. L. Santarelli, "Hyperspectral Fluorescence for Organic Pigment Characterization in Contemporary Artwork," *J. Appl. Laser Spectrosc.*, 2014.

- [45] V. Raimondi *et al.*, "Test measurements on a secco white-lead containing model samples to assess the effects of exposure to low-fluence UV laser radiation," *Appl. Surf. Sci.*, 2015, doi: 10.1016/j.apsusc.2015.02.062.
- [46] R. Ortiz, P. Ortiz, F. Colao, R. Fantoni, M. A. Gómez-Morón, and M. A. Vázquez, "Laser spectroscopy and imaging applications for the study of cultural heritage murals," *Constr. Build. Mater.*, 2015, doi: 10.1016/j.conbuildmat.2015.08.067.
- [47] V. Spizzichino, F. Angelini, L. Caneve, F. Colao, R. Corrias, and L. Ruggiero, "In Situ study of modern synthetic materials and pigments in contemporary paintings by laser-induced fluorescence scanning," *Stud. Conserv.*, 2015, doi: 10.1179/0039363015Z.000000000222.
- [48] A. Mounier, S. Lazare, G. Le Bourdon, C. Aupetit, L. Servant, and F. Daniel, "LED $\mu$ SF: A new portable device for fragile artworks analyses. Application on medieval pigments," *Microchem. J.*, 2016, doi: 10.1016/j.microc.2016.01.008.
- [49] L. Caneve, F. Colao, M. Del Franco, A. Palucci, M. Pistilli, and V. Spizzichino, "Multispectral imaging system based on laser-induced fluorescence for security applications," 2016, doi: 10.1117/12.2240924.
- [50] M. Marinelli, A. Pasqualucci, M. Romani, and G. Verona-Rinati, "Time resolved laser induced fluorescence for characterization of binders in contemporary artworks," *J. Cult. Herit.*, 2017, doi: 10.1016/j.culher.2016.09.005.
- [51] M. Romani, M. Marinelli, A. Pasqualucci, and G. Verona-Rinati, "A preliminary study of contemporary binders by Time Resolved Laser Induced Fluorescence (TR-LIF) spectroscopy: characterization of the painting Nascita Della Forma by Nato Frascà," 2017, doi: 10.12775/3875-4.12.
- [52] M. Oujja *et al.*, "Nonlinear imaging microscopy for assessing structural and photochemical modifications upon laser removal of dammar varnish on photosensitive substrates," *Phys. Chem. Chem. Phys.*, 2017, doi: 10.1039/c7cp02509b.
- [53] L. Pronti, A. C. Felici, M. Ménager, C. Vieillescazes, and M. Piacentini, "Spectral Behavior of White Pigment Mixtures Using Reflectance, Ultraviolet—Fluorescence Spectroscopy, and Multispectral Imaging," *Appl. Spectrosc.*, 2017, doi: 10.1177/0003702817717969.
- [54] S. Almaviva *et al.*, "LIF/Raman/XRF non-invasive microanalysis of frescoes from St. Alexander catacombs in Rome," *Spectrochim. Acta - Part A Mol. Biomol. Spectrosc.*, 2018, doi: 10.1016/j.saa.2018.04.062.
- [55] A. Martínez-Hernández, M. Oujja, M. Sanz, E. Carrasco, V. Detalle, and M. Castillejo, "Analysis of heritage stones and model wall paintings by pulsed laser excitation of Raman, laser-induced fluorescence and laser-induced breakdown spectroscopy signals with a hybrid system," *J. Cult. Herit.*, 2018, doi: 10.1016/j.culher.2018.02.004.
- [56] D. Syvilay *et al.*, "Laser-induced emission, fluorescence and Raman hybrid setup: A versatile instrument to analyze materials from cultural heritage," *Spectrochim. Acta - Part B At. Spectrosc.*, 2018, doi: 10.1016/j.sab.2017.12.006.
- [57] L. Rampazzi *et al.*, "An interdisciplinary approach to a knowledge-based restoration: The dark alteration on Matera Cathedral (Italy)," *Appl. Surf. Sci.*, 2018, doi: 10.1016/j.apsusc.2018.07.101.
- [58] P. Moretti *et al.*, "Laser cleaning of paintings: in situ optimization of operative parameters through non-invasive assessment by optical coherence tomography (OCT), reflection FT-IR spectroscopy and laser induced fluorescence spectroscopy (LIF)," *Herit. Sci.*, 2019, doi: 10.1186/s40494-019-0284-8.
- [59] L. Caneve, M. Guarneri, A. Lai, V. Spizzichino, S. Ceccarelli, and B. Mazzei, "Non-destructive laser based techniques for biodegradation analysis in cultural heritage," *NDT E Int.*, 2019, doi: 10.1016/j.ndteint.2019.03.007.
- [60] L. Bruno, L. Rugnini, V. Spizzichino, L. Caneve, A. Canini, and N. T. W. Ellwood, "Biodeterioration of Roman hypogea: the case study of the Catacombs of SS. Marcellino and Pietro (Rome, Italy)," *Ann. Microbiol.*, 2019, doi: 10.1007/s13213-019-01460-z.
- [61] M. Romani *et al.*, "Raman and Time-Gated-Lif Spectroscopy for the Identification of Painting Materials \*," *J. Appl. Spectrosc.*, 2019, doi: 10.1007/s10812-019-00826-0.
- [62] A. D. Fovo *et al.*, "Multianalytical non-invasive characterization of phthalocyanine acrylic paints through spectroscopic and non-linear optical techniques," *Spectrochim. Acta - Part A Mol. Biomol. Spectrosc.*, 2019, doi: 10.1016/j.saa.2018.09.040.
- [63] A. Gómez-Morón, R. Ortiz, F. Colao, R. Fantoni, J. Becerra, and P. Ortiz, "Laser-Induced Fluorescence mapping of pigments in a secco painted murals," *Ge-Conservacion*, 2020, doi:

- 10.37558/GEC.V17I1.759.
- [64] M. A. Gómez-Morón *et al.*, "Monitoring the Restoration of a Seventeenth-Century Wooden Artwork Using Laser-Induced Fluorescence and Digital Image Analysis," *Appl. Spectrosc.*, 2021, doi: 10.1177/0003702820944505.
- [65] S. Ceccarelli *et al.*, "Are the blue daemons really blue? Multidisciplinary study for the colours characterization of the mural paintings inside the Blue Daemons Etruscan tomb," *J. Cult. Herit.*, 2021, doi: 10.1016/j.culher.2020.09.002.
- [66] M. Oujja *et al.*, "Multiphoton Excitation Fluorescence Microscopy and Spectroscopic Multianalytical Approach for Characterization of Historical Glass Grisailles," *Talanta*, 2021, doi: 10.1016/j.talanta.2021.122314.
- [67] M. F. Caso, L. Caneve, and V. Spizzichino, "Improvement of ENEA laser-induced fluorescence prototypes: An intercalibration between a hyperspectral and a multispectral scanning system," *Acta IMEKO*, 2021, doi: 10.21014/ACTA\_IMEKO.V10I1.822.
- [68] T. Palomar, M. Martínez-Weinbaum, M. Aparicio, L. Maestro-Guijarro, M. Castillejo, and M. Oujja, "Spectroscopic and Microscopic Characterization of Flashed Glasses from Stained Glass Windows," *Appl. Sci.*, vol. 12, p. 5760, 2022, doi: <https://doi.org/10.3390/app12115760>.
